# Supplementary material for: A novel approach for green synthesis of WO3 nanomaterials and their highly selective chemical sensing properties
Source: Royal Society of Chemistry journal article supplement (doi:10.1039/d0ta06418a), 2020-01-01
Supplement: d0ta06418a1.pdf [file d0ta06418a1.pdf]

## Electronic Supplementary Information (ESI)

### A novel approach for green synthesis of WO<sub>3</sub> nanomaterials and their highly selective chemical sensing properties

Vardan Galstyan,<sup>\*a</sup> Nicola Poli,<sup>a</sup> Annalisa D'Arco,<sup>bc</sup> Salvatore Macis,<sup>c</sup> Stefano Lupi,<sup>cd</sup> Elisabetta Comini<sup>a</sup>

<sup>a</sup> Sensor Lab, Department of Information Engineering, University of Brescia, Via Valotti 9, 25133 Brescia, Italy

<sup>b</sup> INFN - National Institute of Nuclear Physics section Rome, P.le A. Moro 2, 00185 Rome, Italy

<sup>c</sup> Physics Department, University of Rome 'La Sapienza', P.le A. Moro 5, 00185 Rome, Italy

<sup>d</sup> INFN-LNF Via E. Fermi 40, 00044 Frascati, Italy

\*E-mail address: [vardan.galstyan@unibs.it](mailto:vardan.galstyan@unibs.it)

### Results

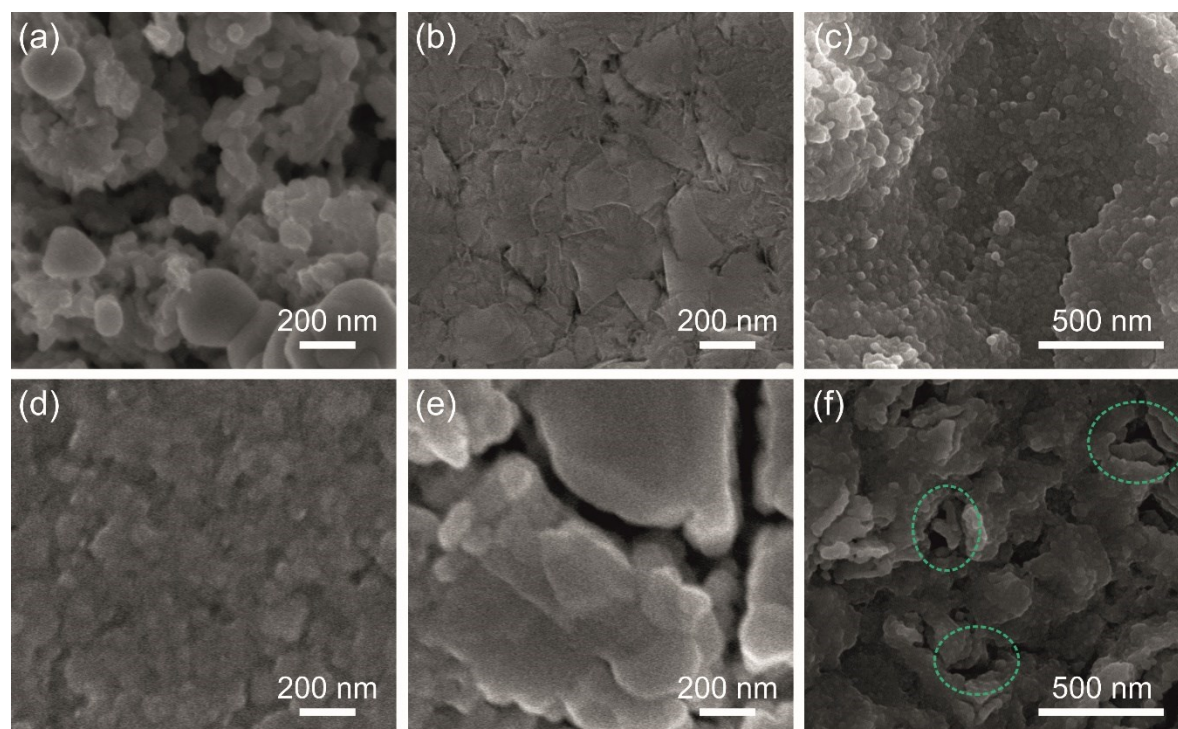

**Fig. S1** Morphological analysis of samples carried out by FESEM.: (a) sample prepared in 0.3 mol L<sup>-1</sup> NaCl containing H<sub>2</sub>O at 180 °C for 20 h, (b) sample prepared in distilled H<sub>2</sub>O at 160 °C for 20 h (the preparation regimes of WO<sub>3</sub>-1 sample without the use of NaCl), c) WO<sub>3</sub>-1, (d) sample obtained under the exposure to H<sub>2</sub>O vapor when the temperature of the reactor was 110 °C and the treatment time was 30 h, (e) sample prepared under the exposure to H<sub>2</sub>O vapor at 140 °C for 35 h, (f) WO<sub>3</sub>-2, where the big porous regions observed on the surface of structure are shown with the green dashed lines.

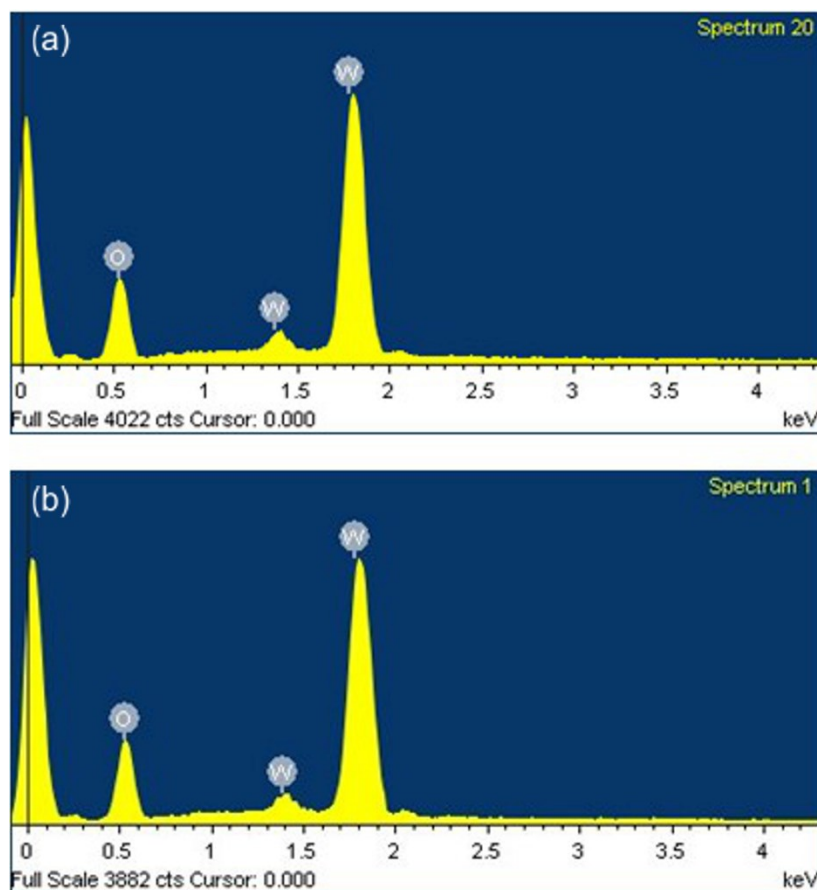

**Fig. S2** EDX spectrum of the prepared materials: (a) WO<sub>3</sub>-1; (b) WO<sub>3</sub>-2. The EDX analysis of the samples were carried out on different areas of each material confirming the presence of expected W and O elements in the WO<sub>3</sub>-1 and WO<sub>3</sub>-2 structures.

**Table S1** Table of the quantitative analysis of WO<sub>3</sub>-1 and WO<sub>3</sub>-2 materials obtained by EDX

| Sample             | W (Atomic%, ±2%) | O (Atomic%, ±2%) |
|--------------------|------------------|------------------|
| WO <sub>3</sub> -1 | 25.2             | 74.8             |
| WO <sub>3</sub> -2 | 25.6             | 74.4             |

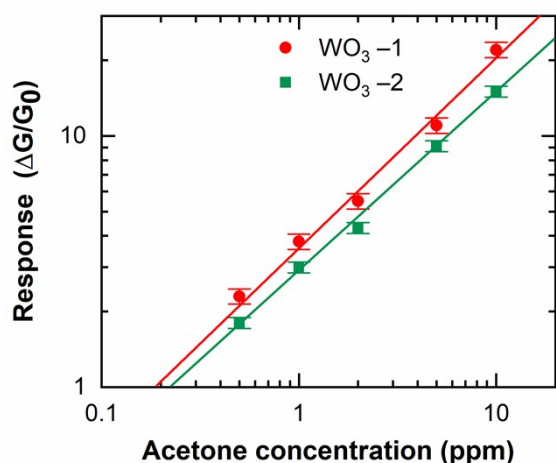

**Fig. S3** Calibration curves of the normalized sensing response of WO<sub>3</sub>-1 and WO<sub>3</sub>-2 samples towards acetone at the operating temperature of 400 °C and RH of 40%. We set the response value ( $\Delta G/G_0$ ) for both sensors to 1 to estimate their LOD. LODs for the WO<sub>3</sub>-1 and WO<sub>3</sub>-2 are about 170 and 220 ppb, respectively.

**Table S2** Sensing parameters of WO<sub>3</sub>-1 and WO<sub>3</sub>-2 structures towards 500 ppb, 1, 2, 5 and 10 ppm of acetone at 400 °C of operating temperature and 40 % of RH. The response and recovery times of sensors were defined as the time to reach 90% of  $\Delta G$  when the gas is introduced and to recover to 70% of the baseline conductance in air. The purging/filling time of the test chamber is about 300 s. Therefore, the lower values of response and recovery times registered by the gas test system can be varied depending on the measurement system and the volume of the test chamber.

| Sample             | Acetone concentration (ppm) | Response | Response time (s) | Recovery time (s) |
|--------------------|-----------------------------|----------|-------------------|-------------------|
| WO <sub>3</sub> -1 | 0.5                         | 2.3      | 330               | 180               |
|                    | 1                           | 3.8      | 180               | 180               |
|                    | 2                           | 5.5      | 210               | 180               |
|                    | 5                           | 11       | 180               | 150               |
|                    | 10                          | 22       | 900               | 150               |
| WO <sub>3</sub> -2 | 0.5                         | 1.8      | 420               | 180               |
|                    | 1                           | 3        | 180               | 180               |
|                    | 2                           | 4.3      | 300               | 180               |
|                    | 5                           | 9.1      | 240               | 180               |
|                    | 10                          | 15       | 950               | 150               |

**Table S3** Dipole moments of the acetone and interfering gases

| Gas             | Dipole moment (D) |
|-----------------|-------------------|
| Acetone         | 2.88              |
| Ethanol         | 1.69              |
| NH <sub>3</sub> | 1.47              |
| Ethylene        | 0                 |
| CH <sub>4</sub> | 0                 |
| CO <sub>2</sub> | 0                 |
| CO              | 0.112             |

**Table S4** Acetone sensing properties of different metal oxide nanostructures. R<sub>0</sub> and R<sub>f</sub> are the resistance values of structures in air and in the presence of acetone, respectively. G<sub>0</sub> and G<sub>f</sub> are the conductance values of structures in air and in the presence of acetone, respectively

| Material                                                               | Concentration (ppm) | Responses                              | Operating temperature (°C) |
|------------------------------------------------------------------------|---------------------|----------------------------------------|----------------------------|
| WO <sub>3</sub> nanofibers <sup>1</sup>                                | 5                   | 7.7 (R <sub>0</sub> /R <sub>f</sub> )  | 400                        |
| WO <sub>3</sub> nanowires <sup>2</sup>                                 | 200                 | 1.4 (R <sub>0</sub> /R <sub>f</sub> )  | 300                        |
| Carbon-doped porous WO <sub>3</sub> <sup>3</sup>                       | 10                  | 13.5 (R <sub>0</sub> /R <sub>f</sub> ) | 390                        |
| polystyrene–WO <sub>3</sub> nanofibers <sup>1</sup>                    | 5                   | 8.4 (R <sub>0</sub> /R <sub>f</sub> )  | 400                        |
| CeO <sub>2</sub> –WO <sub>3</sub> nanowires <sup>4</sup>               | 0.5                 | 1.3 (R <sub>0</sub> /R <sub>f</sub> )  | 250                        |
| Graphene oxide–WO <sub>3</sub> nanofibers <sup>5</sup>                 | 100                 | 35.9 (R <sub>0</sub> /R <sub>f</sub> ) | 375                        |
| Ag–WO <sub>3</sub> nanosheets <sup>6</sup>                             | 100                 | 12.5 (R <sub>0</sub> /R <sub>f</sub> ) | 340                        |
| Carbon-doped WO <sub>3</sub> spheres <sup>7</sup>                      | 10                  | 11.5 (R <sub>0</sub> /R <sub>f</sub> ) | 300                        |
| MO <sub>3</sub> –WO <sub>3</sub> <sup>8</sup>                          | 100                 | 18.2 (R <sub>0</sub> /R <sub>f</sub> ) | 320                        |
| Cr <sub>2</sub> O <sub>3</sub> –WO <sub>3</sub> nanowires <sup>2</sup> | 200                 | 4.1 (R <sub>0</sub> /R <sub>f</sub> )  | 300                        |
| SnO <sub>2</sub> spheres <sup>9</sup>                                  | 5                   | 6.6 (R <sub>0</sub> /R <sub>f</sub> )  | 400                        |
| ZnO–Fe <sub>3</sub> O <sub>4</sub> nanoparticles <sup>10</sup>         | 50                  | 47 (R <sub>0</sub> /R <sub>f</sub> )   | 485                        |
| WO <sub>3</sub> –1 (This work)                                         | 0.5                 | 2.5 (G <sub>f</sub> /G <sub>0</sub> )  | 300                        |
| WO <sub>3</sub> –1 (This work)                                         | 1                   | 2.7 (G <sub>f</sub> /G <sub>0</sub> )  | 300                        |
| WO <sub>3</sub> –1 (This work)                                         | 5                   | 7.8 (G <sub>f</sub> /G <sub>0</sub> )  | 300                        |
| WO <sub>3</sub> –1 (This work)                                         | 10                  | 12.4 (G <sub>f</sub> /G <sub>0</sub> ) | 300                        |
| WO <sub>3</sub> –1 (This work)                                         | 0.5                 | 3.3 (G <sub>f</sub> /G <sub>0</sub> )  | 400                        |
| WO <sub>3</sub> –1 (This work)                                         | 1                   | 4.8 (G <sub>f</sub> /G <sub>0</sub> )  | 400                        |
| WO <sub>3</sub> –1 (This work)                                         | 5                   | 12 (G <sub>f</sub> /G <sub>0</sub> )   | 400                        |

## References

1. S.-J. Choi, S.-J. Kim, H.-J. Cho, J.-S. Jang, Y.-M. Lin, H. L. Tuller, G. C. Rutledge and I.-D. Kim, *Small*, 2016, **12**, 911–920.
2. S. Choi, M. Bonyani, G.-J. Sun, J. K. Lee, S. K. Hyun and C. Lee, *Applied Surface Science*, 2018, **432**, 241–249.
3. M.-D. Wang, Y.-Y. Li, B.-H. Yao, K. Zhai, Z.-J. Li and H.-C. Yao, *Sensors and Actuators B: Chemical*, 2019, **288**, 656–666.
4. K. Yuan, C.-Y. Wang, L.-Y. Zhu, Q. Cao, J.-H. Yang, X.-X. Li, W. Huang, Y.-Y. Wang, H.-L. Lu and D. W. Zhang, *ACS Applied Materials & Interfaces*, 2020, **12**, 14095–14104.
5. J. Zhang, H. Lu, C. Yan, Z. Yang, G. Zhu, J. Gao, F. Yin and C. Wang, *Sensors and Actuators B: Chemical*, 2018, **264**, 128–138.
6. M. Yin, L. Yu and S. Liu, *Materials Letters*, 2017, **186**, 66–69.
7. J.-Y. Shen, L. Zhang, J. Ren, J.-C. Wang, H.-C. Yao and Z.-J. Li, *Sensors and Actuators B: Chemical*, 2017, **239**, 597–607.
8. Y. Sun, L. Chen, Y. Wang, Z. Zhao, P. Li, W. Zhang, Y. Leprince-Wang and J. Hu, *Journal of Materials Science*, 2017, **52**, 1561–1572.
9. H.-J. Cho, S.-J. Choi, N.-H. Kim and I.-D. Kim, *Sensors and Actuators B: Chemical*, 2020, **304**, 127350.
10. L. Zhang, B. Dong, L. Xu, X. Zhang, J. Chen, X. Sun, H. Xu, T. Zhang, X. Bai, S. Zhang and H. Song, *Sensors and Actuators B: Chemical*, 2017, **252**, 367–374.
